# Supplementary material for: Exploring aerosol-cloud interactions in liquid-phase clouds over eastern China and its adjacent ocean using the WRF-Chem-SBM model
Source: Copernicus journal article supplement (doi:10.5194/egusphere-2023-2858), 2023-12-04
Supplement: Supplementary file 1 [file egusphere-2023-2858-supplement.pdf]

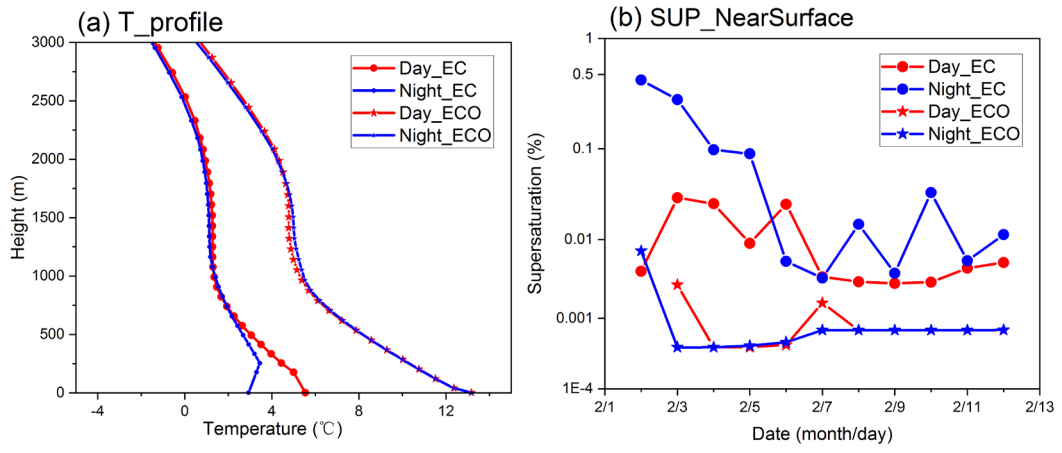

**Figure S1.** Diurnal variation of temperature profile (a, “Day” and “Night” refer to 7:00 to 18:00 and 19:00 to 06:00 of the next day in Beijing time respectively) and supersaturation (b)

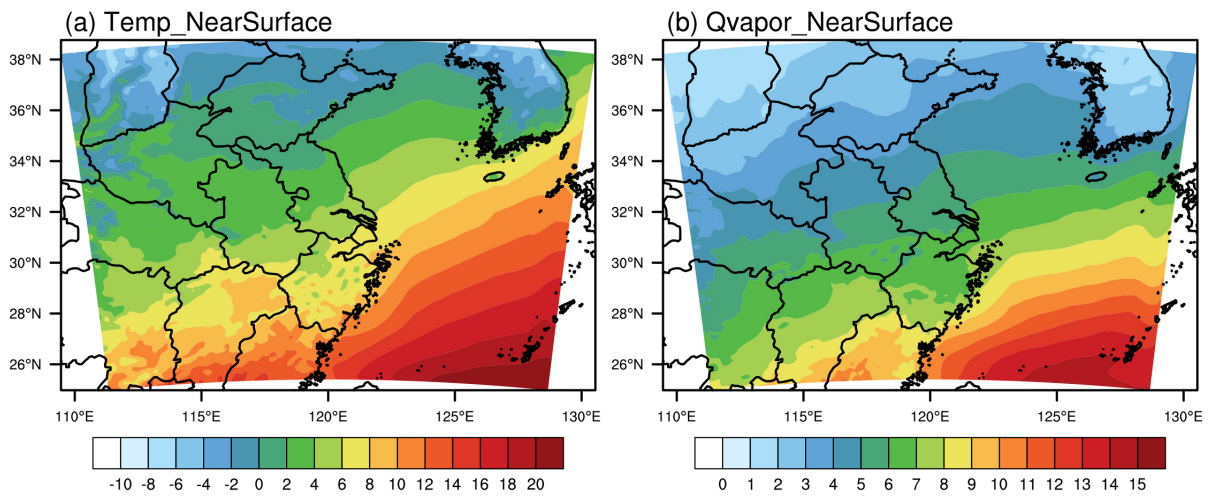

**Figure S2.** Distributions of near-surface average temperature (unit: °C, a) and water vapor content (unit:  $\text{g}\cdot\text{m}^{-3}$ , b)
